# Supplementary material
Source: MDPI journal article supplement (https://www.mdpi.com/2071-1050/12/23/9972)
Supplement: s1 [file s1]

1. ☐      2. ☐      3. ☐      4. ☐      5. ☐

1.10. Perceived risk of cautious driving because of low visibility.

1. ☐      2. ☐      3. ☐      4. ☐      5. ☐

Part 2 Motivation factors. (Agreeance level from 1 to 5)

2.1. If my behavior is bad, I am afraid that it may damage my reputation.

1. ☐      2. ☐      3. ☐      4. ☐      5. ☐

2.2. I want to be considered as a good person with public morals

1. ☐      2. ☐      3. ☐      4. ☐      5. ☐

2.3. I want to do something to mitigate haze for the health of family members.

1. ☐      2. ☐      3. ☐      4. ☐      5. ☐

2.4. I want to create good environment for children.

1. ☐      2. ☐      3. ☐      4. ☐      5. ☐

2.5. I like to use sharing bike because of saving money.

1. ☐      2. ☐      3. ☐      4. ☐      5. ☐

2.6. I like to use sharing bike because of convenience..

1. ☐      2. ☐      3. ☐      4. ☐      5. ☐

Part 3 Action. (Agreeance level from 1 to 5)

3.1. I have to use air purifier during haze days.

1. ☐      2. ☐      3. ☐      4. ☐      5. ☐

3.2. I wear face mask during haze days.

1. ☐      2. ☐      3. ☐      4. ☐      5. ☐

3.3. I use Mobil phone to check severity of haze condition.

1. ☐      2. ☐      3. ☐      4. ☐      5. ☐

3.4. I eat anti-haze food as much as possible.

1. ☐      2. ☐      3. ☐      4. ☐      5. ☐

3.5. I am considering moving to clean area to live.

1. ☐      2. ☐      3. ☐      4. ☐      5. ☐

3.6. I already reducing driving, and try to ride bike as much as possible.

1. ☐      2. ☐      3. ☐      4. ☐      5. ☐

3.7. I focus on more on renewable energy than before, I hope government can promote renewable energy more.

1. ☐      2. ☐      3. ☐      4. ☐      5. ☐

Thank you very much for your cooperation!
